# Supplementary material
Source: PubMed Central journal article supplement (PMC3471558)
Supplement: NIHMS396754-supplement-Supplementary_Figure_2.pdf [file NIHMS396754-supplement-Supplementary_Figure_2.pdf]

| Antigen                                            | Clone type        | Dilution | Antigen retrieval | Information                 |
|----------------------------------------------------|-------------------|----------|-------------------|-----------------------------|
| IL-11                                              | Rabbit polyclonal | 1:40     | citrate           | WEHI Ab services            |
| 1H9 or 2B6 (H <sup>+</sup> /K <sup>+</sup> ATPase) | Mouse monoclonal  | neat     | none              | Gift from Dr Ian vanDriel   |
| Intrinsic factor                                   | Rabbit polyclonal | 1:500    | citrate           | Gift from Dr David Alpers   |
| Ki- 67                                             | Rabbit polyclonal | 1:1000   | citrate           | Pharmlingen 550609          |
| Muc5aC                                             | Rabbit polyclonal | 1:100    | citrate           | Abcam ab28372               |
| GSII                                               | Lectin            | 10µg/ml  | none              | Jomar BA-2401-2             |
| vWF                                                | Rabbit polyclonal | 1:1000   | citrate           | Dako A0082                  |
| Smooth muscle actin                                | Rabbit polyclonal | 1:200    | citrate           | Abcam ab5694                |
| PSTAT3                                             | Rabbit polyclonal | 1:100    | citrate           | Cell Signalling 9131        |
| Cleaved caspase 3                                  | Rabbit polyclonal | 1:500    | citrate           | Cell Signaling 9661         |
| Gastrin                                            | Rabbit polyclonal | 1:2000   | citrate           | Gift from Dr Arthur Shulkes |

**Supplementary Table 1.** Antibodies used for immunohistochemistry.
