# Supplementary material
Source: PubMed Central journal article supplement (PMC3471558)
Supplement: NIHMS396754-supplement-Supplementary_Figure_Legends.pdf [file NIHMS396754-supplement-Supplementary_Figure_Legends.pdf]

### Supplementary figure 1

WT mice were treated with 5 µg IL-11 i.p. or saline 6 hourly and sacrificed at 24 hours, 5 or 7 days. One group of WT mice was treated at 6 hourly intervals for 7 days and rested for 4 weeks prior to sacrifice. Microscopic images of AB-PAS-stained fundic sections from saline and IL-11 treated mice (Ai-v). The proportion of the gland occupied by PAS positive surface mucous cells (µm) was measured linearly from microscopic images (line in Ai-v) and expressed as a proportion of total gland height (µm) (B). Muc5AC surface mucous cells and GSII positive mucous neck cells were immunohistochemically localised in WT, saline control mice (Ci, Di) and WT mice treated 6 hourly with 5 µg IL-11 for 7 days (Cii, Dii). TFF1 (E) and TFF2 (F) mRNA were measured in the gastric fundus of WT mice treated with 5 µg IL-11 at 6 hourly intervals for 24 hours or 5 and 7 days by QPCR, standardised against the housekeeping gene L32 and expressed as fold change compared to saline treated mice ( $\Delta\Delta C_t$  method). Bars refer to the mean value  $\pm$  SEM, \* indicates  $p \leq 0.05$ .
