# Supplementary material
Source: PubMed Central journal article supplement (PMC3471558)
Supplement: NIHMS396754-supplement-Supplementary_Table_1.pdf [file NIHMS396754-supplement-Supplementary_Table_1.pdf]

| Gene                  | Forward                         | Reverse                   |
|-----------------------|---------------------------------|---------------------------|
| IL-11                 | CTGCAAGCCCGACTGGAA              | AGGCCAGGCGAGACATCA        |
| IL-1 $\beta$          | CAGGCAGTATCACTCATTGTGG          | GTGCAGTTGTCTAATGGGAACG    |
| Gastrin               | CACTTCATAGCAGACCTGTCCAA         | CATCCGTAGGCCTCTTCTTCTTC   |
| CCKB receptor         | ATGACGCTACACCAACCA              | GAGGACTCTGTGGGGTTGAA      |
| Histamine H2 receptor | CCTCCCTGCCAGAGATAAGA            | TGGTTGCGTGGCAATCC         |
| KCNJ16                | TGTGCATCCTCAGACCTTTG            | GTGATCCTCTGCCTTCAGGA      |
| KCNJ15                | CAGGGCAGCAGATCAATGTA            | TTCCCATGAAAAAGAAAAACA     |
| KCNF1                 | AAGCTTGGTGTCCAGGCTAC            | TGCAAACCCTGGATTTAACC      |
| KCNK6                 | TGCATACCTCAATCCCTTGTC           | CCCTTTGTGTAGGGTGGAAAG     |
| SLC26A9               | CCCTAAATACAAGATCAAAGACTACATCATC | GCCTTGTGGCACCTGGAT        |
| SLC26A7               | CGGTACCTGCTGCGATAACT            | CCAAAATGTGTGCAAAATGC      |
| SLC26A6               | AGCAGCATGTCTTTGCCTCT            | TGACCTGTCACAACCTCCAG      |
| CFTR                  | GAGTGAGGAGGACAGGGATG            | GGCCGTCTTAACCTTTGGTA      |
| SLC9A2                | CCATGCTGAGCTGAAGGACT            | GACTTCCCACCCACACTCTG      |
| SLC5A8                | TGAGATTGCTGGTGCCATGT            | TCTGAAAGTGTGTGGTCATTATCCA |
| SLC24A3               | TTACAGGATGCCACCAACAA            | GAGGTGAACCCATTCTGTGG      |
| IL-33                 | TATGAGTCTCCCTGTCCTGCAA          | CTCATGTTCAACCATCACTTCTTC  |
| IL-4                  | GTCATCCTGCTCTTCTTTCTCG          | TCACTCTCTGTGGTTCTTCG      |
| IL-13                 | GTGCCAAGATCTGTGTCTCTCC          | TTACAGAGGCCATGCAATATCC    |
| $\gamma$ -IFN         | TCAAGTGGCATAGATGTGGAAGAA        | TGGCTCTGCAGGATTTTCATG     |
| TFF1                  | AGAGGTTGCTGTTTTGATG             | AGTCTGAGGGGTTGAACTG       |
| TFF2                  | CCCCACAACAGAAAGAAC              | GGGCACTTCAAAGATCAG        |
| DMBT1                 | GCTCCACAAGCACAGATTCC            | TGCCATCTCATTGTTCTTGG      |
| WFDC2                 | ATTCTGAGCTTCAGCCTCCA            | GGACCAGGAAGAAATGCAAA      |
| IGFBP4                | CTGAGACCCACCTCTGCTCT            | CTTCCTACCCCATTCCTTT       |
| AQP5                  | CTCACAGCAGTTCAGGACCA            | AGAGCTCTCAGGCAATGTCC      |
| TIMP1                 | CCCAGAACCGCAGTGAAGA             | GGCACTGATGTGCAAATTTCC     |
| MMP3                  | CAAGGGTGGATGCTGTCTTT            | AGGATGCCTTCCTTGATCT       |

### Supplementary table 1

Primer sequences for Q-RTPCR analysis
