# Supplementary material
Source: PubMed Central journal article supplement (PMC3471558)

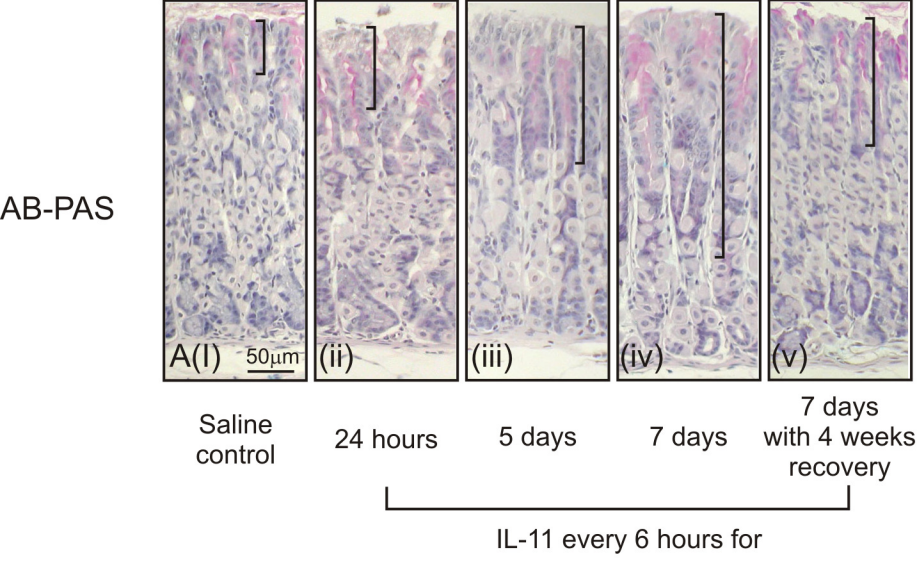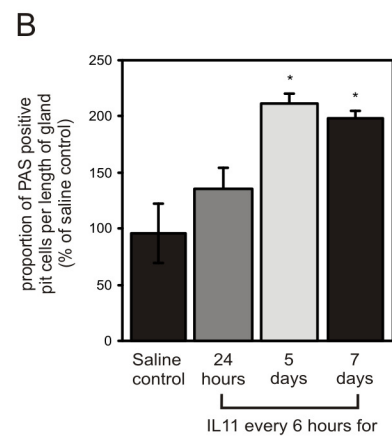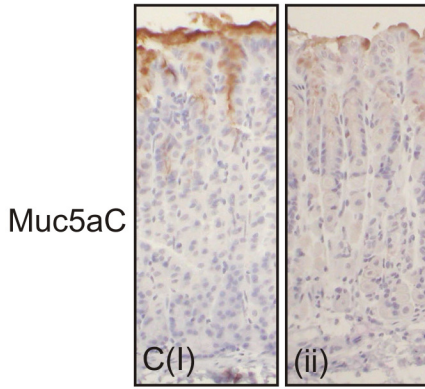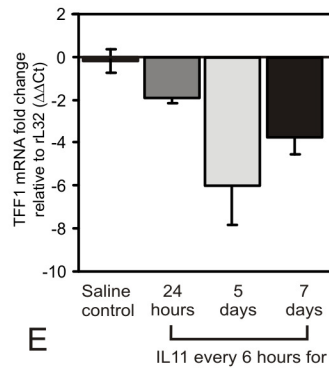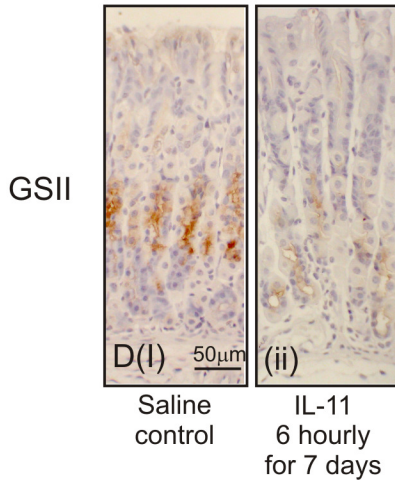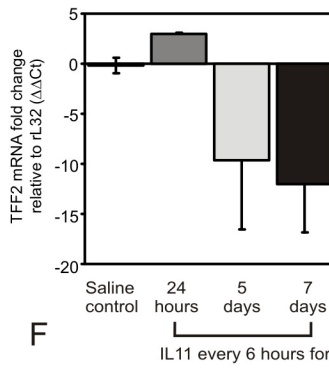

Supplement: NIHMS396754-supplement-Supplementary_Figure_1.pdf [file NIHMS396754-supplement-Supplementary_Figure_1.pdf]
